# Supplementary material for: Nanoarchitectonics of CdFe2O4 nanoparticles with different morphologies synthesized using a thermal decomposition approach and studies of their peroxidase-like activity
Source: Royal Society of Chemistry journal article supplement (doi:10.1039/d3nj05330j), 2024-01-01
Supplement: d3nj05330j1.pdf [file d3nj05330j1.pdf]

## Supporting Information

### Nanoarchitectonics of CdFe<sub>2</sub>O<sub>4</sub> nanoparticles with different morphologies using thermal decomposition approach and studies on their peroxidase-like activity

Kumkum Gangwar and Pethaiyan Jeevanandam\*

Department of Chemistry, Indian Institute of Technology Roorkee, Roorkee-247667, India

E-mail: jeevafcy@iitr.ac.in; Fax: +91-1332-273560; Tel: +91-1332-285444

#### Figures and Tables:

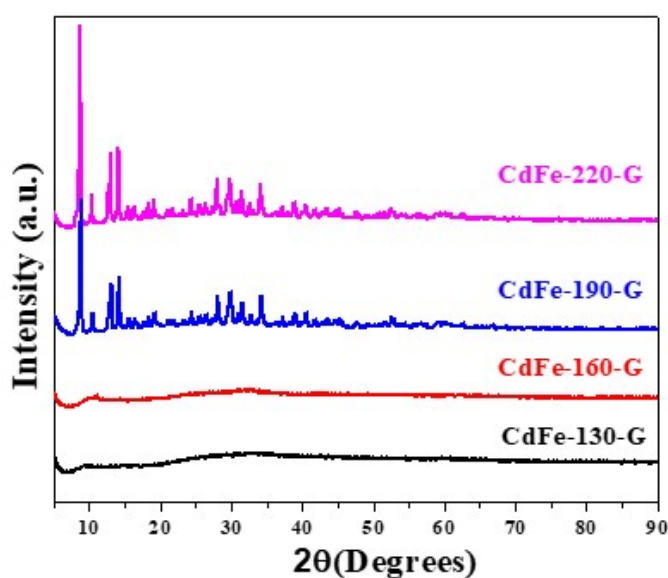

Figure S1. XRD patterns of Cd-Fe glycolates synthesized at different temperatures.

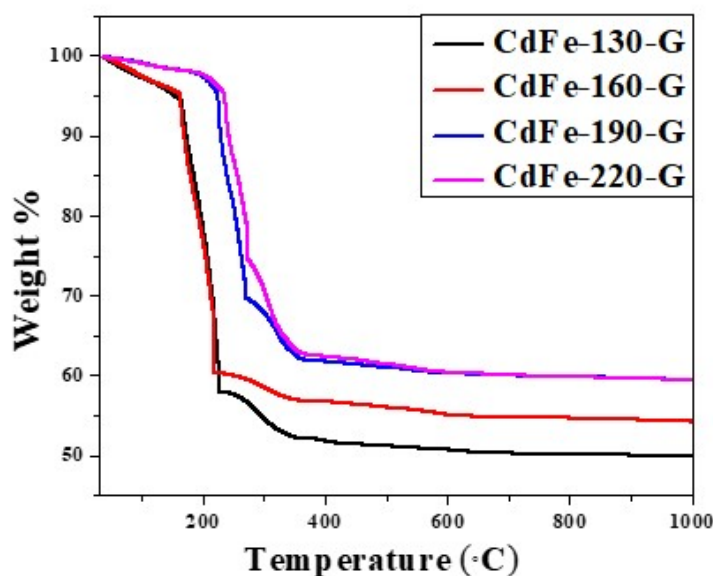

Figure S2. TGA curves of Cd-Fe glycolates synthesized at different temperatures.

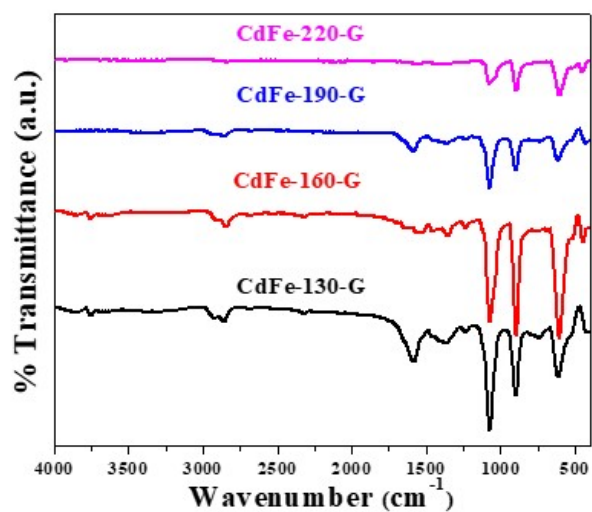

Figure S3. FT-IR spectra of Cd-Fe glycolates synthesized at different temperatures.

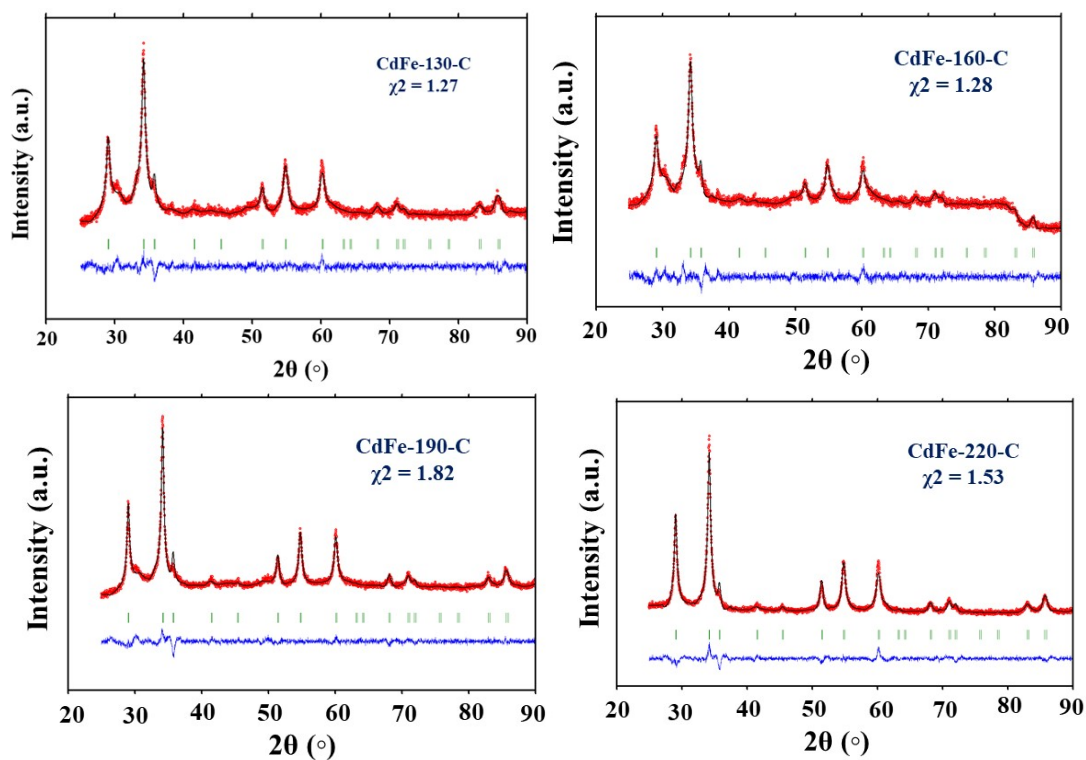

Figure S4. Rietveld refinement fits of powder XRD data for  $\text{CdFe}_2\text{O}_4$  nanoparticles. The solid black line, green colored ticks and the blue line represent best fits to XRD data, position of Bragg peaks and the difference between refined and experimental data, respectively.

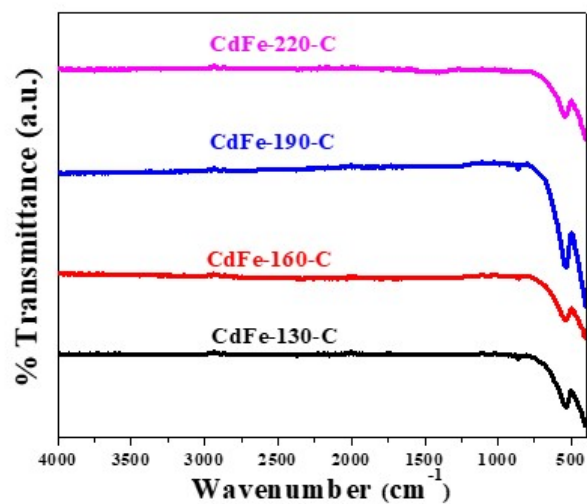

Figure S5. FT-IR spectra of CdFe<sub>2</sub>O<sub>4</sub> nanoparticles obtained on calcination of Cd-Fe glycolates at 500 °C.

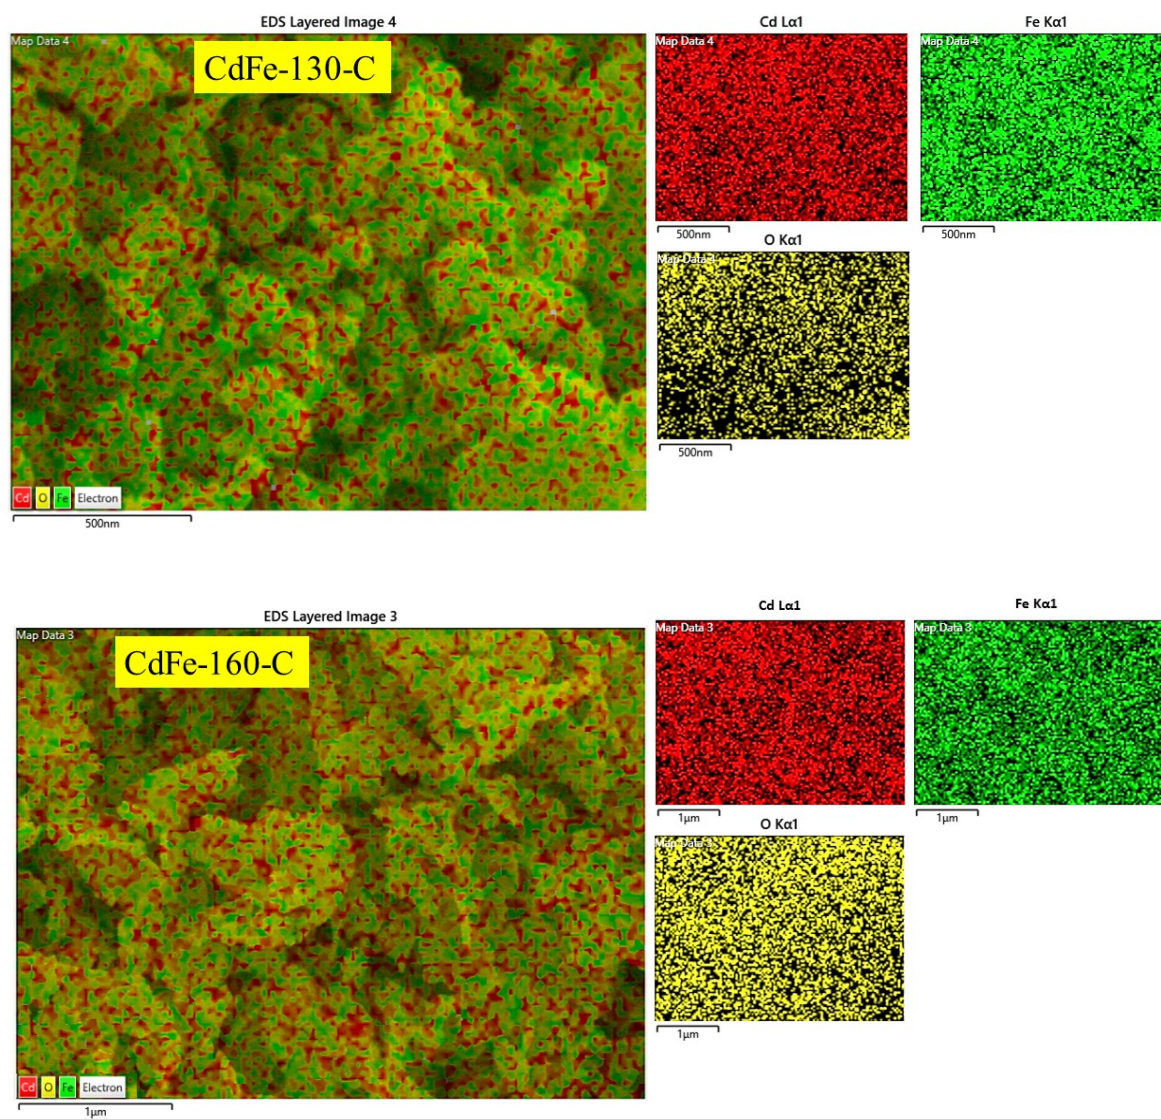

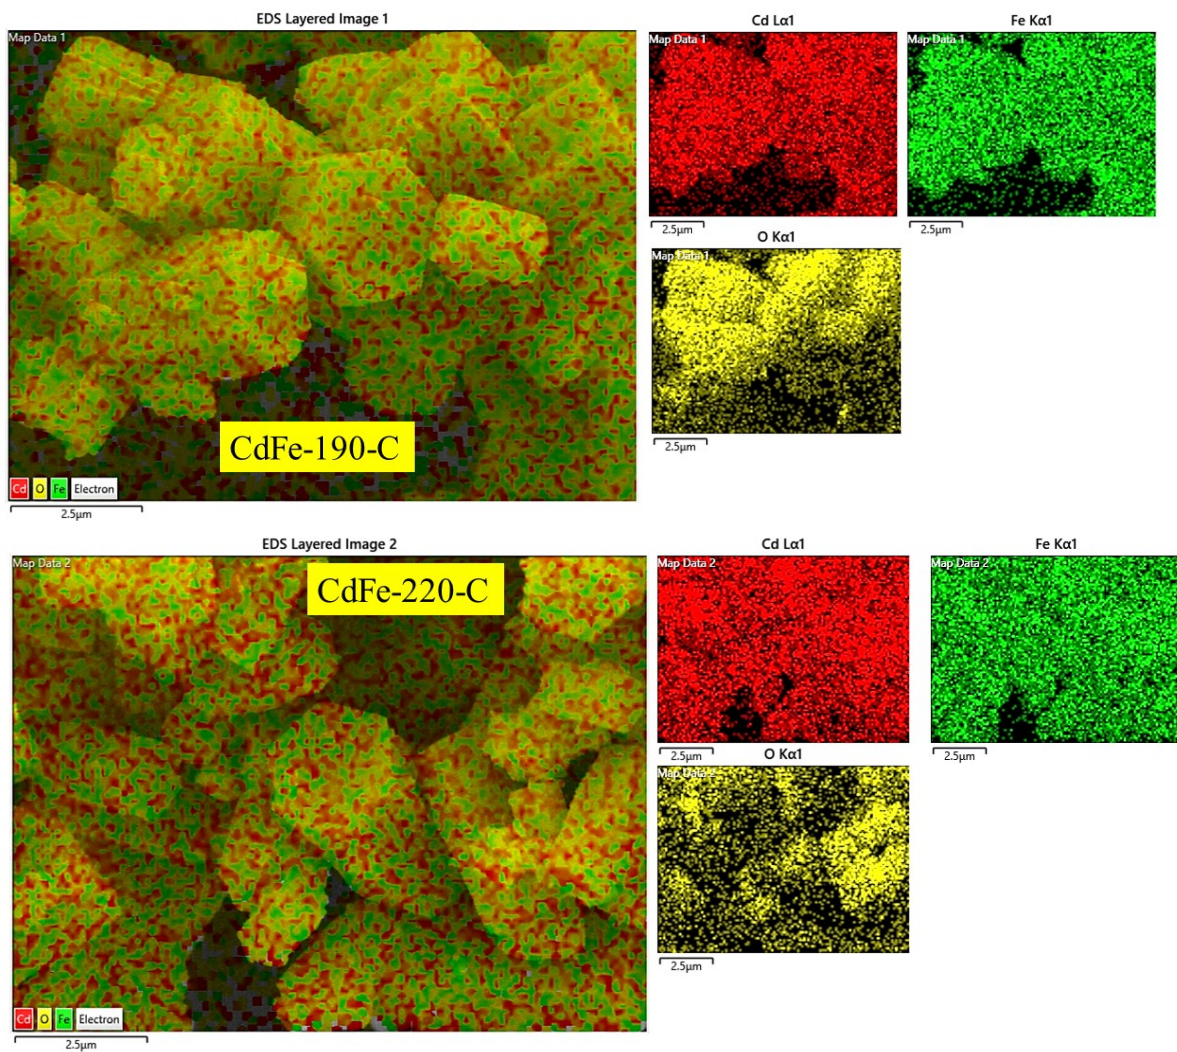

Figure S6. Elemental mapping of CdFe<sub>2</sub>O<sub>4</sub> nanoparticles.

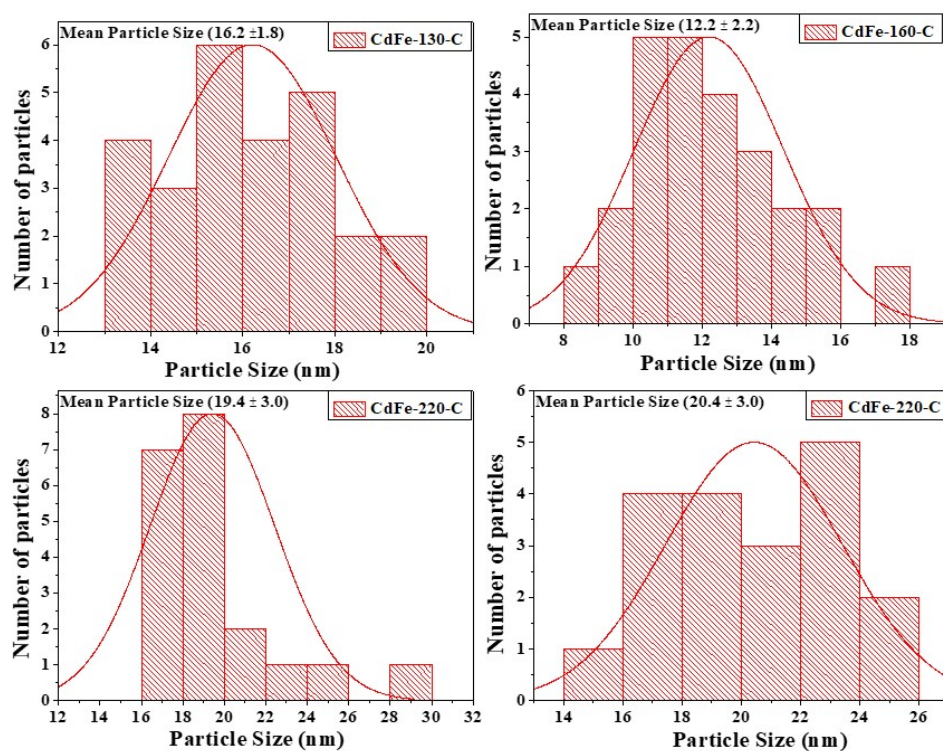

Figure S7. Particle size histograms of CdFe<sub>2</sub>O<sub>4</sub> nanoparticles.

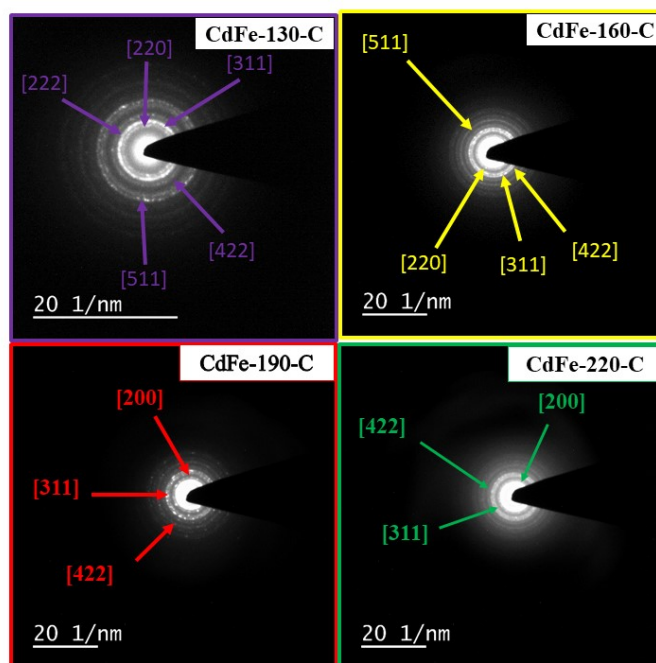

Figure S8. SAED patterns of CdFe<sub>2</sub>O<sub>4</sub> nanoparticles.

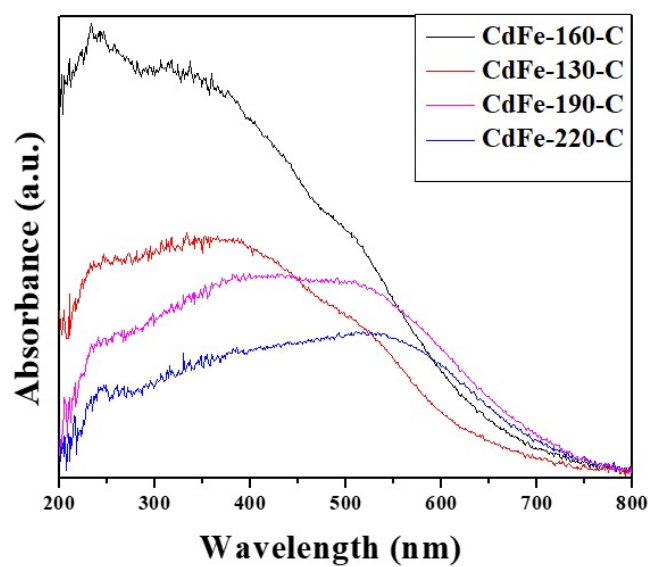

Figure S9. DRS spectra of CdFe<sub>2</sub>O<sub>4</sub> nanoparticles.

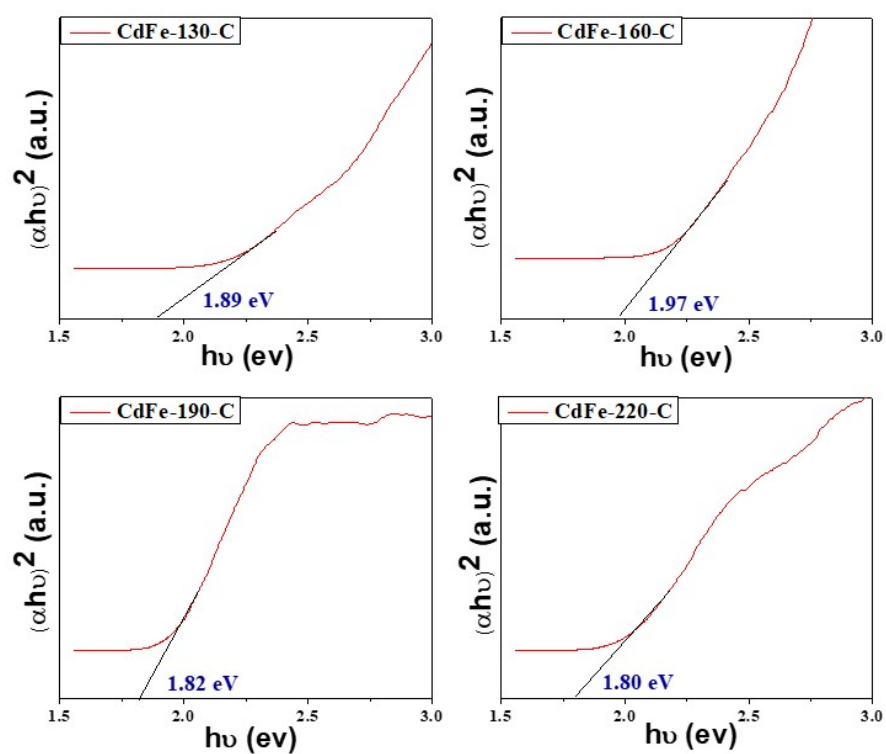

Figure S10. Tauc plots of CdFe<sub>2</sub>O<sub>4</sub> nanoparticles.

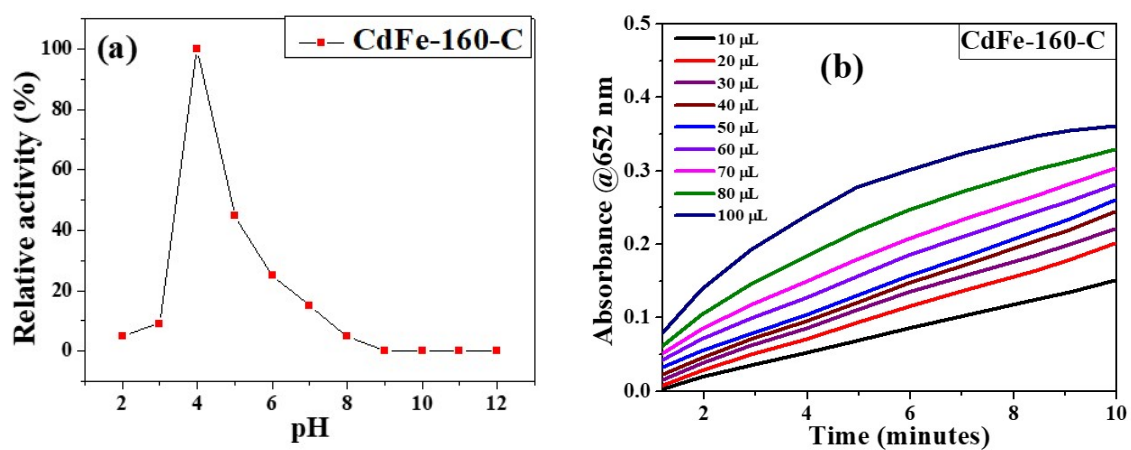

Figure S11. Effect of experimental conditions on peroxidase-like activity of CdFe<sub>2</sub>O<sub>4</sub> nanoparticles (CdFe-160-C); (a) pH and (b) amount of catalyst dispersion.

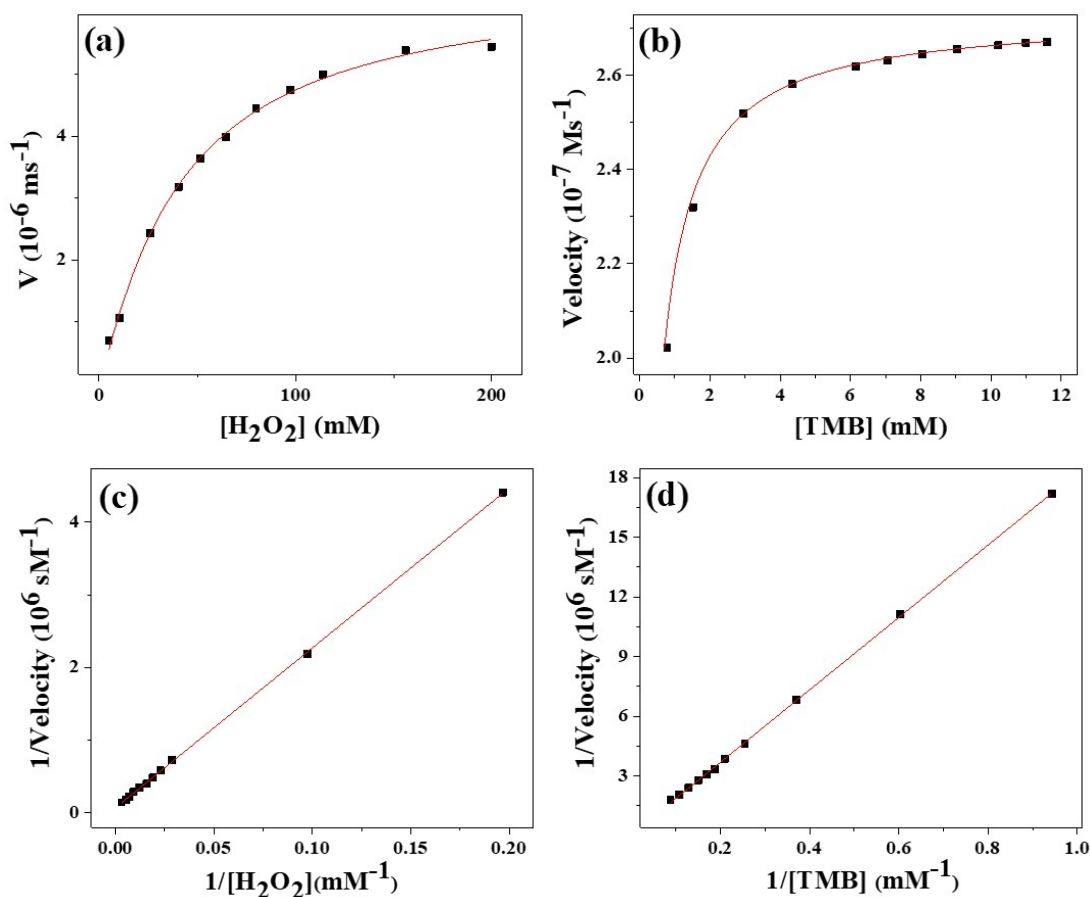

**Figure S12:** Steady-state kinetics results (a,b) and Lineweaver-Burk double reciprocal plots (c,d) of CdFe<sub>2</sub>O<sub>4</sub> nanoparticles (CdFe-160-C) using different substrates H<sub>2</sub>O<sub>2</sub> and TMB during the peroxidase-like activity studies.

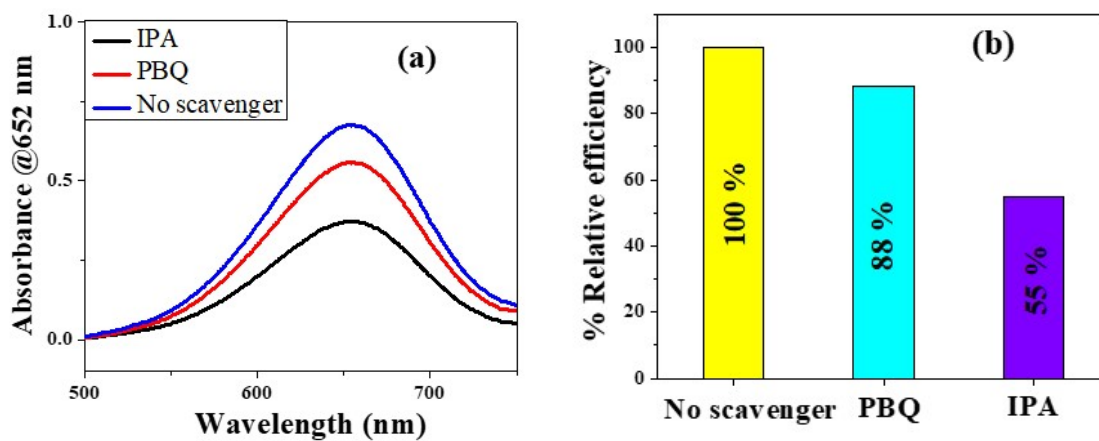

**Figure S13:** (a) UV-Vis spectra showing the effect of scavenger (IPA and PBQ) on the peroxidase-like activity of CdFe<sub>2</sub>O<sub>4</sub> nanoparticles (CdFe-160-C) and (b) variation of peroxidase-like activity with different scavengers.

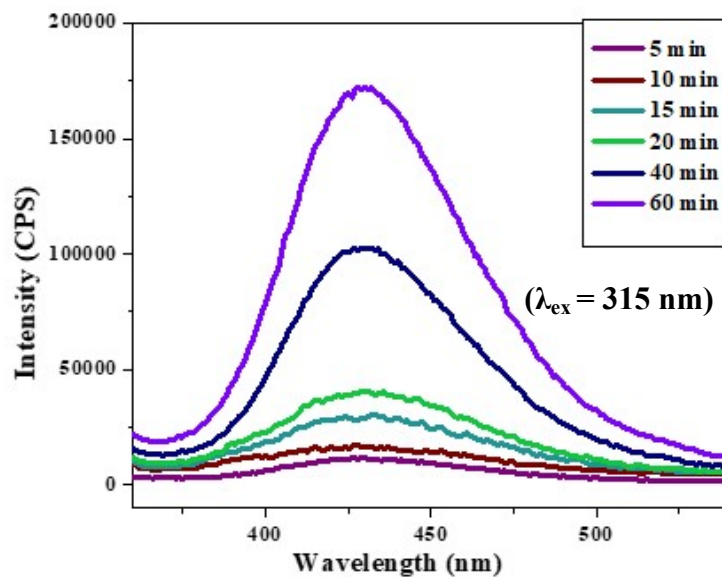

**Figure S14.** Fluorescence spectra indicating the formation of hydroxyl radicals during the catalytic oxidation of TMB by CdFe-160-C nanoparticles.

**Table S1.** Summary on TGA results of Cd-Fe glycolates prepared using different synthesis temperatures.

| Sample code | Loss of physisorbed water and ethylene glycol molecules |            | Decomposition of organic moieties |            | Oxidation of dehydrated Cd-Fe glycolate |            | Overall weight loss (%) |
|-------------|---------------------------------------------------------|------------|-----------------------------------|------------|-----------------------------------------|------------|-------------------------|
|             | Temp. (°C)                                              | % Wt. loss | Temp. (°C)                        | % Wt. loss | Temp. (°C)                              | % Wt. loss |                         |
| CdFe-130-G  | 30-162                                                  | 5.5        | 162-226                           | 40.2       | 226-340                                 | 5.6        | 51.3                    |
| CdFe-160-G  | 30-159                                                  | 5.2        | 159-217                           | 35.0       | 271-349                                 | 3.5        | 43.7                    |
| CdFe-190-G  | 30-219                                                  | 4.1        | 219-269                           | 25.0       | 269-354                                 | 8.5        | 37.6                    |
| CdFe-220-G  | 30-230                                                  | 4.3        | 230-272                           | 19.3       | 272-352                                 | 13.0       | 36.6                    |



Table S2: Summary of IR bands observed in Cd-Fe glycolates along with their assignment.

| CdFe-130-G | CdFe-160-G | CdFe-190-G | CdFe-220-G | Assignment                                                  |
|------------|------------|------------|------------|-------------------------------------------------------------|
| 2925, 2864 | 2917, 2840 | 2932, 2858 | 2845       | $\nu_{(\text{CH}_2)}$ (asym.), $\nu_{(\text{CH}_2)}$ (sym.) |
| 1581       | 1549       | 1592       | -          | $\nu_{(\text{C}=\text{O})}$                                 |
| 1459       | 1453       | -          | -          | $\delta_{(\text{C}-\text{OH})}$                             |
| 1378       | 1357       | -          | -          | $\omega_{(\text{CH}_2)}$                                    |
| 1235       | 1232       | 1239       | 1239       | $\nu_{(\text{C}-\text{C}-\text{O})}$                        |
| 1071       | 1068       | 1071       | 1069       | $\nu_{(\text{C}-\text{C})}$                                 |
| 898        | 894        | 894        | 899        | $\nu_{(\text{C}-\text{O})}$                                 |
| 614        | 605        | 615        | 612        | $\nu_{(\text{M}-\text{O})}$ $T_d$                           |
| 421        | 442        | 429        | 452        | $\nu_{(\text{M}-\text{O})}$ $O_h$                           |

Table S3: EDX analysis results for Cd-Fe glycolates. The analysis was done at three different spots for each sample.

| Sample code | Cd    |       | Fe    |       | Comment |
|-------------|-------|-------|-------|-------|---------|
|             | At. % | Wt. % | At.%  | Wt.%  |         |
| CdFe-130-G  | 12.20 | 25.16 | 24.32 | 50.88 | Uniform |
|             | 13.34 | 25.24 | 25.46 | 49.96 |         |
|             | 12.28 | 25.30 | 24.61 | 48.93 |         |
| CdFe-160-G  | 13.43 | 25.09 | 26.19 | 50.90 | Uniform |
|             | 14.52 | 25.23 | 28.50 | 50.32 |         |
|             | 13.22 | 24.42 | 28.67 | 49.52 |         |
| CdFe-190-G  | 14.28 | 20.54 | 30.40 | 40.35 | Uniform |
|             | 15.25 | 21.13 | 30.35 | 42.32 |         |
|             | 15.30 | 21.50 | 30.43 | 42.42 |         |
| CdFe-220-G  | 16.60 | 27.20 | 32.11 | 53.92 | Uniform |
|             | 16.52 | 26.10 | 32.30 | 54.26 |         |
|             | 15.41 | 26.35 | 30.40 | 54.44 |         |

Table S4: EDX analysis results for CdFe<sub>2</sub>O<sub>4</sub> NPs. For each sample, the analysis was done at three different spots.

| Sample code | Cd    |       | Fe    |       | Comment |
|-------------|-------|-------|-------|-------|---------|
|             | At. % | Wt. % | At.%  | Wt.%  |         |
| CdFe-130-C  | 15.30 | 22.56 | 28.30 | 43.88 | Uniform |
|             | 16.30 | 22.14 | 27.45 | 43.96 |         |
|             | 15.28 | 21.90 | 28.60 | 43.93 |         |
| CdFe-160-C  | 15.41 | 27.09 | 31.19 | 54.92 | Uniform |
|             | 15.51 | 26.23 | 30.50 | 54.30 |         |
|             | 15.26 | 25.42 | 32.67 | 53.50 |         |
| CdFe-190-C  | 15.30 | 22.56 | 28.44 | 43.88 | Uniform |
|             | 16.30 | 22.14 | 28.85 | 43.96 |         |
|             | 15.28 | 21.90 | 28.69 | 43.93 |         |
| CdFe-220-C  | 17.62 | 28.30 | 31.19 | 58.92 | Uniform |
|             | 17.50 | 27.20 | 33.33 | 57.22 |         |
|             | 16.40 | 27.45 | 35.42 | 56.43 |         |
